# Supplementary material
Source: MDPI journal article supplement (https://www.mdpi.com/1999-4907/14/4/732)
Supplement: s1 [file s1]

## Supplementary materials

**Table S1**

Table S1 Effects of three plant growth retardants on the height of *M. alternifolia*

| NO. | 7d (cm)                   | 14d (cm)                 | 21d (cm)                 | 28d (cm)                 | 35d (cm)                   |
|-----|---------------------------|--------------------------|--------------------------|--------------------------|----------------------------|
| P1  | 31.23±1.72 <sup>AB</sup>  | 32.43±0.85 <sup>AB</sup> | 32.83±2.32 <sup>AB</sup> | 32.90±2.19 <sup>AB</sup> | 33.37±1.33 <sup>BCD</sup>  |
| P2  | 30.17±1.63 <sup>ABC</sup> | 31.10±1.08 <sup>AB</sup> | 33.00±0.96 <sup>AB</sup> | 33.13±1.51 <sup>AB</sup> | 36.33±0.74 <sup>A</sup>    |
| P3  | 27.37±0.96 <sup>C</sup>   | 30.03±1.12 <sup>B</sup>  | 30.73±1.93 <sup>B</sup>  | 30.20±2.31 <sup>B</sup>  | 29.80±1.28 <sup>E</sup>    |
| P4  | 28.3±1.61 <sup>BC</sup>   | 30.73±0.90 <sup>AB</sup> | 31.20±1.28 <sup>B</sup>  | 31.80±0.90 <sup>AB</sup> | 32.20±0.46 <sup>CDE</sup>  |
| S1  | 29.53±0.38 <sup>ABC</sup> | 32.57±1.55 <sup>AB</sup> | 32.93±0.74 <sup>AB</sup> | 32.93±0.74 <sup>AB</sup> | 34.23±0.51 <sup>ABCD</sup> |
| S2  | 28.60±0.85 <sup>ABC</sup> | 30.10±0.87 <sup>B</sup>  | 31.07±1.14 <sup>B</sup>  | 31.47±0.65 <sup>AB</sup> | 31.63±1.70 <sup>DE</sup>   |
| S3  | 28.27±2.20 <sup>BC</sup>  | 30.20±2.59 <sup>B</sup>  | 31.43±2.68 <sup>AB</sup> | 31.53±2.97 <sup>AB</sup> | 31.77±2.10 <sup>CDE</sup>  |
| S4  | 29.20±0.61 <sup>ABC</sup> | 31.40±0.80 <sup>AB</sup> | 32.40±0.82 <sup>AB</sup> | 32.70±0.53 <sup>AB</sup> | 33.43±0.50 <sup>BCD</sup>  |
| C1  | 31.13±0.15 <sup>AB</sup>  | 33.57±0.61 <sup>A</sup>  | 34.97±1.19 <sup>A</sup>  | 35.20±1.13 <sup>A</sup>  | 35.77±0.91 <sup>AB</sup>   |
| C2  | 31.73±1.25 <sup>A</sup>   | 32.83±0.86 <sup>AB</sup> | 33.63±0.93 <sup>AB</sup> | 34.03±1.44 <sup>AB</sup> | 34.37±0.59 <sup>ABC</sup>  |
| C3  | 30.77±0.95 <sup>AB</sup>  | 31.90±0.60 <sup>AB</sup> | 32.33±1.12 <sup>AB</sup> | 32.53±1.14 <sup>AB</sup> | 32.80±0.78 <sup>CD</sup>   |
| C4  | 30.93±0.32 <sup>AB</sup>  | 32.30±0.78 <sup>AB</sup> | 33.47±0.71 <sup>AB</sup> | 33.90±0.21 <sup>AB</sup> | 34.03±0.12 <sup>ABCD</sup> |
| CK  | 30.90±1.01 <sup>AB</sup>  | 31.63±1.08 <sup>AB</sup> | 33.37±0.86 <sup>AB</sup> | 33.83±0.59 <sup>AB</sup> | 34.27±0.68 <sup>ABCD</sup> |

Note: Different letters followed the mean indicate significance at  $P < 0.01$  according to Duncan's multiple range test, the same below.

**Table S2**

Table S2 Effects of three plant growth retardants on the roughness of *M. alternifolia*

| NO. | 7d (cm)                    | 14d (cm)                   | 21d (cm)                   | 28d (cm)                   | 35d (cm)                   |
|-----|----------------------------|----------------------------|----------------------------|----------------------------|----------------------------|
| P1  | 0.2873±0.0309 <sup>A</sup> | 0.3037±0.0318 <sup>A</sup> | 0.3177±0.0211 <sup>A</sup> | 0.3183±0.0376 <sup>A</sup> | 0.3353±0.0267 <sup>A</sup> |
| P2  | 0.2660±0.0160 <sup>A</sup> | 0.2727±0.0254 <sup>A</sup> | 0.2810±0.0121 <sup>A</sup> | 0.2930±0.0062 <sup>A</sup> | 0.2943±0.0095 <sup>A</sup> |
| P3  | 0.3097±0.0622 <sup>A</sup> | 0.3277±0.0114 <sup>A</sup> | 0.3297±0.0254 <sup>A</sup> | 0.3390±0.0055 <sup>A</sup> | 0.3457±0.0419 <sup>A</sup> |
| P4  | 0.2971±0.0051 <sup>A</sup> | 0.3143±0.0286 <sup>A</sup> | 0.3243±0.0346 <sup>A</sup> | 0.3315±0.0043 <sup>A</sup> | 0.3386±0.0324 <sup>A</sup> |
| S1  | 0.2717±0.0461 <sup>A</sup> | 0.2917±0.0258 <sup>A</sup> | 0.2963±0.0526 <sup>A</sup> | 0.3113±0.0318 <sup>A</sup> | 0.3237±0.0337 <sup>A</sup> |
| S2  | 0.2963±0.0390 <sup>A</sup> | 0.3207±0.0186 <sup>A</sup> | 0.3283±0.0247 <sup>A</sup> | 0.3330±0.0079 <sup>A</sup> | 0.3437±0.0843 <sup>A</sup> |
| S3  | 0.2800±0.0046 <sup>A</sup> | 0.2953±0.0206 <sup>A</sup> | 0.3220±0.0517 <sup>A</sup> | 0.3310±0.0104 <sup>A</sup> | 0.3410±0.0255 <sup>A</sup> |
| S4  | 0.2793±0.0032 <sup>A</sup> | 0.2843±0.0366 <sup>A</sup> | 0.3120±0.0633 <sup>A</sup> | 0.3223±0.0146 <sup>A</sup> | 0.3285±0.0320 <sup>A</sup> |
| C1  | 0.2670±0.0128 <sup>A</sup> | 0.2803±0.0386 <sup>A</sup> | 0.2893±0.0145 <sup>A</sup> | 0.2973±0.0280 <sup>A</sup> | 0.3057±0.0180 <sup>A</sup> |
| C2  | 0.2837±0.0078 <sup>A</sup> | 0.2900±0.0262 <sup>A</sup> | 0.2950±0.0115 <sup>A</sup> | 0.3020±0.0142 <sup>A</sup> | 0.3197±0.0119 <sup>A</sup> |
| C3  | 0.3087±0.0675 <sup>A</sup> | 0.3190±0.0396 <sup>A</sup> | 0.3207±0.0306 <sup>A</sup> | 0.3263±0.0405 <sup>A</sup> | 0.3373±0.0174 <sup>A</sup> |
| C4  | 0.3093±0.0042 <sup>A</sup> | 0.3203±0.0216 <sup>A</sup> | 0.3240±0.0035 <sup>A</sup> | 0.3315±0.0046 <sup>A</sup> | 0.3392±0.0128 <sup>A</sup> |
| CK  | 0.2640±0.0082 <sup>A</sup> | 0.2777±0.0139 <sup>A</sup> | 0.2873±0.0035 <sup>A</sup> | 0.2970±0.0120 <sup>A</sup> | 0.2997±0.0144 <sup>A</sup> |

**Table S3**

Table S3 Effects of different plant growth retardants on leaf morphology of *M. alternifolia*

| NO. | Leaf length (cm)            | Leaf width (cm)          | Leaf area (cm <sup>2</sup> ) |
|-----|-----------------------------|--------------------------|------------------------------|
| P1  | 1.166±0.13 <sup>ABCDE</sup> | 0.104±0.01 <sup>AB</sup> | 0.098±0.02 <sup>ABCD</sup>   |
| P2  | 0.992±0.07 <sup>DE</sup>    | 0.102±0.01 <sup>AB</sup> | 0.080±0.01 <sup>BCD</sup>    |
| P3  | 1.272±0.07 <sup>AB</sup>    | 0.122±0.01 <sup>A</sup>  | 0.120±0.02 <sup>A</sup>      |
| P4  | 1.103±0.08 <sup>ABCDE</sup> | 0.100±0.02 <sup>AB</sup> | 0.110±0.01 <sup>AB</sup>     |
| S1  | 1.306±0.19 <sup>A</sup>     | 0.118±0.01 <sup>A</sup>  | 0.116±0.02 <sup>A</sup>      |
| S2  | 1.190±0.08 <sup>ABCD</sup>  | 0.102±0.01 <sup>AB</sup> | 0.100±0.02 <sup>ABCD</sup>   |
| S3  | 1.026±0.08 <sup>CDE</sup>   | 0.096±0.03 <sup>AB</sup> | 0.076±0.01 <sup>CD</sup>     |
| S4  | 1.012±0.12 <sup>CDE</sup>   | 0.094±0.01 <sup>AB</sup> | 0.071±0.02 <sup>CD</sup>     |
| C1  | 1.074±0.11 <sup>BCDE</sup>  | 0.106±0.02 <sup>AB</sup> | 0.078±0.02 <sup>BCD</sup>    |
| C2  | 1.020±0.20 <sup>CDE</sup>   | 0.104±0.02 <sup>AB</sup> | 0.076±0.03 <sup>CD</sup>     |
| C3  | 0.964±0.13 <sup>DE</sup>    | 0.088±0.01 <sup>B</sup>  | 0.072±0.02 <sup>CD</sup>     |
| C4  | 0.943±0.09 <sup>E</sup>     | 0.086±0.02 <sup>B</sup>  | 0.067±0.03 <sup>D</sup>      |
| CK  | 1.224±0.19 <sup>ABC</sup>   | 0.102±0.02 <sup>AB</sup> | 0.104±0.03 <sup>ABC</sup>    |

**Table S4**

Table S4: Effects of three plant growth retardants on the Chlorophyll content of *M. alternifolia*

| NO. | Ca (mg·g <sup>-1</sup> )     | Cb (mg·g <sup>-1</sup> )     | C (a+b) (mg·g <sup>-1</sup> ) | Car (mg·g <sup>-1</sup> )    | Chl a/b                      |
|-----|------------------------------|------------------------------|-------------------------------|------------------------------|------------------------------|
| P1  | 1.5985±0.2541 <sup>CD</sup>  | 0.4923±0.0920 <sup>C</sup>   | 2.0900±0.3487 <sup>C</sup>    | 0.1598±0.0254 <sup>CD</sup>  | 3.2604±0.1078 <sup>ABC</sup> |
| P2  | 1.8326±0.1933 <sup>BCD</sup> | 0.5728±0.0824 <sup>BC</sup>  | 2.4067±0.2715 <sup>BC</sup>   | 0.1833±0.0194 <sup>BCD</sup> | 3.2115±0.1455 <sup>ABC</sup> |
| P3  | 1.8251±0.0524 <sup>BCD</sup> | 0.5483±0.0160 <sup>BC</sup>  | 2.3733±0.0702 <sup>BC</sup>   | 0.1825±0.0052 <sup>BCD</sup> | 3.3290±0.0279 <sup>AB</sup>  |
| P4  | 1.6301±0.0541 <sup>CD</sup>  | 0.5275±0.0264 <sup>B</sup>   | 2.1575±0.0623 <sup>C</sup>    | 0.1630±0.0541 <sup>CD</sup>  | 3.0901±0.0279 <sup>BC</sup>  |
| S1  | 2.0417±0.0855 <sup>AB</sup>  | 0.6616±0.0498 <sup>AB</sup>  | 2.7033±0.1332 <sup>AB</sup>   | 0.2042±0.0085 <sup>AB</sup>  | 3.0917±0.1246 <sup>BC</sup>  |
| S2  | 1.9005±0.0626 <sup>ABC</sup> | 0.5998±0.0186 <sup>ABC</sup> | 2.5033±0.0802 <sup>ABC</sup>  | 0.1900±0.0063 <sup>ABC</sup> | 3.1686±0.0517 <sup>ABC</sup> |
| S3  | 1.5790±0.0409 <sup>CD</sup>  | 0.5146±0.0158 <sup>C</sup>   | 2.0933±0.0551 <sup>C</sup>    | 0.1579±0.0041 <sup>CD</sup>  | 3.0692±0.0836 <sup>C</sup>   |
| S4  | 1.5643±0.0761 <sup>D</sup>   | 0.4973±0.0319 <sup>C</sup>   | 2.0615±0.0087 <sup>C</sup>    | 0.1564±0.0124 <sup>D</sup>   | 3.1456±0.0643 <sup>ABC</sup> |
| C1  | 1.6107±0.0711 <sup>CD</sup>  | 0.4782±0.0292 <sup>C</sup>   | 2.0889±0.1041 <sup>C</sup>    | 0.1611±0.0071 <sup>CD</sup>  | 3.3680±0.0808 <sup>A</sup>   |
| C2  | 2.1774±0.1220 <sup>A</sup>   | 0.7187±0.0667 <sup>A</sup>   | 2.8967±0.1872 <sup>A</sup>    | 0.2177±0.0122 <sup>A</sup>   | 3.0362±0.1071 <sup>C</sup>   |
| C3  | 1.6847±0.1429 <sup>CD</sup>  | 0.4962±0.0519 <sup>C</sup>   | 2.1833±0.1966 <sup>C</sup>    | 0.1685±0.0143 <sup>CD</sup>  | 3.3995±0.0661 <sup>A</sup>   |
| C4  | 1.5893±0.0306 <sup>CD</sup>  | 0.4810±0.0381 <sup>C</sup>   | 2.0702±0.0551 <sup>C</sup>    | 0.1589±0.0314 <sup>CD</sup>  | 3.3042±0.0628 <sup>AB</sup>  |
| CK  | 1.5563±0.0767 <sup>D</sup>   | 0.4771±0.0251 <sup>C</sup>   | 2.0333±0.1002 <sup>C</sup>    | 0.1556±0.0077 <sup>D</sup>   | 3.2628±0.0888 <sup>ABC</sup> |

Table S5

Table S5 Leaf anatomical structure of *M. alternifolia* with different plant growth retardants

| No. | Leaf thickness                          | Upper epidermis                | Lower epidermis                | Upper palisade tissue           | Lower palisade tissue            | Sponge tissue                   | Mesophyll tissue                   |
|-----|-----------------------------------------|--------------------------------|--------------------------------|---------------------------------|----------------------------------|---------------------------------|------------------------------------|
|     | ( $\mu\text{m}$ )                       | thickness ( $\mu\text{m}$ )    | thickness ( $\mu\text{m}$ )    | thickness ( $\mu\text{m}$ )     | thickness ( $\mu\text{m}$ )      | thickness ( $\mu\text{m}$ )     | thickness ( $\mu\text{m}$ )        |
| P1  | 150.04 $\pm$ 5.63 <sup>G</sup>          | 9.83 $\pm$ 1.25 <sup>B</sup>   | 6.77 $\pm$ 0.45 <sup>C</sup>   | 41.14 $\pm$ 3.62 <sup>C</sup>   | 31.14 $\pm$ 2.60 <sup>E</sup>    | 46.68 $\pm$ 6.54 <sup>F</sup>   | 126.38 $\pm$ 7.65 <sup>G</sup>     |
| P2  | 169.32 $\pm$ 4.70 <sup>EF</sup>         | 10.43 $\pm$ 0.67 <sup>AB</sup> | 8.84 $\pm$ 0.55 <sup>AB</sup>  | 52.48 $\pm$ 4.44 <sup>AB</sup>  | 33.98 $\pm$ 2.40 <sup>DE</sup>   | 62.02 $\pm$ 4.44 <sup>E</sup>   | 147.93 $\pm$ 2.98 <sup>EF</sup>    |
| P3  | 204.63 $\pm$ 7.51 <sup>A</sup>          | 11.80 $\pm$ 1.92 <sup>AB</sup> | 10.31 $\pm$ 0.61 <sup>A</sup>  | 55.88 $\pm$ 6.82 <sup>A</sup>   | 43.05 $\pm$ 3.08 <sup>A</sup>    | 97.68 $\pm$ 2.04 <sup>A</sup>   | 176.41 $\pm$ 6.99 <sup>A</sup>     |
| P4  | 183.22 $\pm$ 5.52 <sup>BCDE</sup><br>E  | 11.30 $\pm$ 2.01 <sup>AB</sup> | 9.83 $\pm$ 0.37 <sup>AB</sup>  | 47.85 $\pm$ 6.26 <sup>ABC</sup> | 40.36 $\pm$ 2.54 <sup>AB</sup>   | 77.60 $\pm$ 3.89 <sup>D</sup>   | 159.44 $\pm$ 2.14 <sup>BCDE</sup>  |
| S1  | 199.76 $\pm$ 9.84 <sup>AB</sup>         | 10.59 $\pm$ 1.69 <sup>AB</sup> | 9.18 $\pm$ 1.19 <sup>AB</sup>  | 52.09 $\pm$ 6.59 <sup>AB</sup>  | 39.82 $\pm$ 1.66 <sup>ABCD</sup> | 97.72 $\pm$ 7.22 <sup>A</sup>   | 174.74 $\pm$ 10.15 <sup>AB</sup>   |
| S2  | 186.19 $\pm$ 12.96 <sup>AB</sup><br>CDE | 12.19 $\pm$ 1.28 <sup>AB</sup> | 9.88 $\pm$ 2.08 <sup>AB</sup>  | 48.33 $\pm$ 4.89 <sup>ABC</sup> | 30.91 $\pm$ 3.80 <sup>E</sup>    | 91.45 $\pm$ 6.29 <sup>AB</sup>  | 171.46 $\pm$ 9.57 <sup>ABC</sup>   |
| S3  | 179.71 $\pm$ 9.11 <sup>CDE</sup>        | 11.87 $\pm$ 1.74 <sup>AB</sup> | 9.07 $\pm$ 0.92 <sup>AB</sup>  | 45.78 $\pm$ 1.66 <sup>ABC</sup> | 38.77 $\pm$ 4.10 <sup>ABCD</sup> | 79.51 $\pm$ 5.93 <sup>CD</sup>  | 155.43 $\pm$ 6.15 <sup>DEF</sup>   |
| S4  | 176.26 $\pm$ 9.25 <sup>DEF</sup>        | 11.21 $\pm$ 1.03 <sup>AB</sup> | 8.15 $\pm$ 1.24 <sup>BC</sup>  | 43.93 $\pm$ 5.56 <sup>BC</sup>  | 35.98 $\pm$ 1.99 <sup>BCDE</sup> | 83.86 $\pm$ 6.42 <sup>BCD</sup> | 160.73 $\pm$ 5.84 <sup>BCDE</sup>  |
| C1  | 193.14 $\pm$ 16.82 <sup>AB</sup><br>CD  | 12.41 $\pm$ 1.45 <sup>A</sup>  | 10.29 $\pm$ 1.36 <sup>AB</sup> | 52.50 $\pm$ 2.34 <sup>AB</sup>  | 39.29 $\pm$ 2.12 <sup>ABC</sup>  | 90.10 $\pm$ 7.83 <sup>AB</sup>  | 168.63 $\pm$ 13.56 <sup>ABCD</sup> |
| C2  | 197.82 $\pm$ 11.88 <sup>AB</sup><br>C   | 11.04 $\pm$ 1.47 <sup>AB</sup> | 9.79 $\pm$ 1.51 <sup>AB</sup>  | 49.10 $\pm$ 1.75 <sup>ABC</sup> | 34.49 $\pm$ 2.82 <sup>CDE</sup>  | 94.52 $\pm$ 9.36 <sup>A</sup>   | 176.86 $\pm$ 10.65 <sup>A</sup>    |
| C3  | 191.00 $\pm$ 9.22 <sup>ABC</sup><br>D   | 11.24 $\pm$ 1.35 <sup>AB</sup> | 10.08 $\pm$ 1.72 <sup>AB</sup> | 51.90 $\pm$ 9.58 <sup>AB</sup>  | 35.94 $\pm$ 4.92 <sup>BCDE</sup> | 88.98 $\pm$ 3.46 <sup>ABC</sup> | 167.95 $\pm$ 7.32 <sup>ABCD</sup>  |
| C4  | 187.99 $\pm$ 5.17 <sup>ABC</sup><br>D   | 10.85 $\pm$ 1.77 <sup>AB</sup> | 10.89 $\pm$ 1.26 <sup>A</sup>  | 45.81 $\pm$ 7.64 <sup>ABC</sup> | 34.37 $\pm$ 2.59 <sup>CDE</sup>  | 77.32 $\pm$ 4.81 <sup>D</sup>   | 158.51 $\pm$ 8.26 <sup>CDEF</sup>  |
| CK  | 161.92 $\pm$ 12.14 <sup>FG</sup>        | 10.15 $\pm$ 0.84 <sup>AB</sup> | 9.37 $\pm$ 0.60 <sup>AB</sup>  | 49.38 $\pm$ 6.70 <sup>ABC</sup> | 38.55 $\pm$ 4.55 <sup>ABCD</sup> | 55.55 $\pm$ 5.10 <sup>EF</sup>  | 144.08 $\pm$ 11.54 <sup>F</sup>    |

**Table S6**

Table S6. Soluble sugar content of *M. alternifolia* treated with different PGRs in different periods (mg·g<sup>-1</sup>)<sup>1)</sup>

| NO. | 7d                       | 14d                     | 21d                      | 28d                      | 35d                     |
|-----|--------------------------|-------------------------|--------------------------|--------------------------|-------------------------|
| P1  | 49.54±0.29 <sup>C</sup>  | 43.70±0.14 <sup>G</sup> | 42.28±0.76 <sup>BC</sup> | 46.07±0.55 <sup>B</sup>  | 43.50±0.90 <sup>E</sup> |
| P2  | 43.80±0.32 <sup>G</sup>  | 40.38±0.47 <sup>I</sup> | 39.18±0.08 <sup>F</sup>  | 37.27±0.51 <sup>FG</sup> | 39.81±0.69 <sup>G</sup> |
| P3  | 59.05±0.32 <sup>A</sup>  | 47.19±0.47 <sup>F</sup> | 41.72±0.21 <sup>CD</sup> | 43.71±0.49 <sup>C</sup>  | 43.88±0.59 <sup>E</sup> |
| P4  | 46.31±0.23 <sup>F</sup>  | 42.45±0.23 <sup>H</sup> | 40.62±0.33 <sup>E</sup>  | 41.39±0.16 <sup>D</sup>  | 42.31±0.15 <sup>F</sup> |
| S1  | 48.46±0.49 <sup>D</sup>  | 52.71±0.38 <sup>B</sup> | 42.85±0.51 <sup>B</sup>  | 37.70±0.58 <sup>F</sup>  | 43.72±0.47 <sup>E</sup> |
| S2  | 48.98±0.35 <sup>CD</sup> | 54.84±0.37 <sup>A</sup> | 45.89±0.43 <sup>A</sup>  | 51.03±0.26 <sup>A</sup>  | 55.78±0.18 <sup>A</sup> |
| S3  | 48.73±0.42 <sup>D</sup>  | 49.14±0.18 <sup>D</sup> | 41.08±0.72 <sup>DE</sup> | 38.19±0.37 <sup>F</sup>  | 49.46±0.47 <sup>B</sup> |
| S4  | 47.39±0.13 <sup>E</sup>  | 48.36±0.21 <sup>E</sup> | 40.25±0.12 <sup>E</sup>  | 36.37±0.17 <sup>GH</sup> | 41.42±0.37 <sup>F</sup> |
| C1  | 51.94±0.42 <sup>B</sup>  | 55.13±0.29 <sup>A</sup> | 45.22±0.58 <sup>A</sup>  | 39.44±0.39 <sup>E</sup>  | 47.93±0.17 <sup>C</sup> |
| C2  | 48.94±0.29 <sup>CD</sup> | 50.65±0.51 <sup>C</sup> | 38.94±0.32 <sup>FG</sup> | 39.25±0.53 <sup>E</sup>  | 46.02±0.43 <sup>D</sup> |
| C3  | 46.72±0.33 <sup>EF</sup> | 50.04±0.08 <sup>C</sup> | 38.08±0.47 <sup>G</sup>  | 37.87±0.29 <sup>F</sup>  | 45.44±0.68 <sup>D</sup> |
| C4  | 44.41±0.16 <sup>G</sup>  | 48.32±0.53 <sup>E</sup> | 36.28±0.43 <sup>H</sup>  | 35.43±0.41 <sup>H</sup>  | 41.23±0.42 <sup>F</sup> |
| CK  | 41.26±0.34 <sup>H</sup>  | 44.08±0.07 <sup>G</sup> | 34.10±0.55 <sup>I</sup>  | 32.97±0.58 <sup>I</sup>  | 39.45±0.48 <sup>G</sup> |

**Table S7**

Table S7. Soluble protein content of *M. alternifolia* treated with different PGRs in different periods (mgprot·mL<sup>-1</sup>)

| NO. | 7d                         | 14d                        | 21d                         | 28d                         | 35d                         |
|-----|----------------------------|----------------------------|-----------------------------|-----------------------------|-----------------------------|
| P1  | 0.1151±0.002 <sup>D</sup>  | 0.1648±0.002 <sup>BC</sup> | 0.1320±0.001 <sup>BC</sup>  | 0.1435±0.002 <sup>C</sup>   | 0.1753±0.005 <sup>A</sup>   |
| P2  | 0.1536±0.004 <sup>AB</sup> | 0.1785±0.005 <sup>A</sup>  | 0.1535±0.005 <sup>A</sup>   | 0.1547±0.006 <sup>B</sup>   | 0.1760±0.002 <sup>A</sup>   |
| P3  | 0.1462±0.001 <sup>B</sup>  | 0.1748±0.003 <sup>A</sup>  | 0.1379±0.001 <sup>B</sup>   | 0.1342±0.004 <sup>DEF</sup> | 0.1750±0.005 <sup>A</sup>   |
| P4  | 0.1342±0.002 <sup>C</sup>  | 0.1585±0.002 <sup>DC</sup> | 0.1270±0.002 <sup>C</sup>   | 0.1245±0.003 <sup>G</sup>   | 0.1545±0.002 <sup>C</sup>   |
| S1  | 0.1258±0.003 <sup>C</sup>  | 0.1471±0.002 <sup>EF</sup> | 0.1165±0.002 <sup>D</sup>   | 0.1521±0.003 <sup>B</sup>   | 0.1718±0.003 <sup>AB</sup>  |
| S2  | 0.1592±0.003 <sup>A</sup>  | 0.1667±0.003 <sup>B</sup>  | 0.1284±0.004 <sup>C</sup>   | 0.1748±0.005 <sup>A</sup>   | 0.1815±0.004 <sup>A</sup>   |
| S3  | 0.1498±0.006 <sup>AB</sup> | 0.1522±0.002 <sup>DE</sup> | 0.1135±0.002 <sup>DEF</sup> | 0.1394±0.002 <sup>CD</sup>  | 0.1645±0.007 <sup>B</sup>   |
| S4  | 0.1318±0.004 <sup>C</sup>  | 0.1492±0.001 <sup>E</sup>  | 0.1095±0.003 <sup>DEF</sup> | 0.1362±0.001 <sup>CDE</sup> | 0.1543±0.003 <sup>C</sup>   |
| C1  | 0.1542±0.002 <sup>AB</sup> | 0.1607±0.002 <sup>BC</sup> | 0.1145±0.004 <sup>DE</sup>  | 0.1296±0.002 <sup>EFG</sup> | 0.1487±0.004 <sup>CD</sup>  |
| C2  | 0.1320±0.001 <sup>C</sup>  | 0.1456±0.002 <sup>EF</sup> | 0.1144±0.005 <sup>DE</sup>  | 0.1278±0.003 <sup>FG</sup>  | 0.1450±0.005 <sup>CDE</sup> |
| C3  | 0.1316±0.002 <sup>C</sup>  | 0.1411±0.003 <sup>FG</sup> | 0.1099±0.004 <sup>DEF</sup> | 0.1251±0.002 <sup>G</sup>   | 0.1391±0.005 <sup>DE</sup>  |
| C4  | 0.1303±0.001 <sup>C</sup>  | 0.1385±0.003 <sup>GH</sup> | 0.1075±0.003 <sup>EF</sup>  | 0.1242±0.004 <sup>G</sup>   | 0.1362±0.006 <sup>E</sup>   |
| CK  | 0.1094±0.004 <sup>D</sup>  | 0.1335±0.006 <sup>H</sup>  | 0.1065±0.004 <sup>F</sup>   | 0.1227±0.003 <sup>G</sup>   | 0.1357±0.005 <sup>E</sup>   |

**Table S8**Table S8. MDA content of *M. treated with different PGRs in different periods* (nmol·g<sup>-1</sup>)

| NO. | 7d                        | 14d                      | 21d                      | 28d                       | 35d                       |
|-----|---------------------------|--------------------------|--------------------------|---------------------------|---------------------------|
| P1  | 10.99±3.29 <sup>F</sup>   | 21.04±2.31 <sup>DE</sup> | 22.82±0.48 <sup>DE</sup> | 13.76±3.41 <sup>DE</sup>  | 20.51±2.94 <sup>D</sup>   |
| P2  | 20.57±1.90 <sup>CDE</sup> | 30.35±3.23 <sup>C</sup>  | 24.07±3.30 <sup>DE</sup> | 14.76±2.93 <sup>CDE</sup> | 25.80±1.96 <sup>BCD</sup> |
| P3  | 8.37±1.42 <sup>F</sup>    | 19.94±2.21 <sup>E</sup>  | 20.72±2.04 <sup>E</sup>  | 8.53±3.75 <sup>E</sup>    | 20.36±1.27 <sup>D</sup>   |
| P4  | 9.78±1.23 <sup>F</sup>    | 20.26±2.43 <sup>DE</sup> | 21.57±2.43 <sup>DE</sup> | 10.53±3.26 <sup>E</sup>   | 21.62±1.58 <sup>D</sup>   |
| S1  | 19.94±2.75 <sup>CDE</sup> | 28.21±3.46 <sup>C</sup>  | 27.37±3.70 <sup>CD</sup> | 20.62±1.75 <sup>BC</sup>  | 29.41±2.43 <sup>BC</sup>  |
| S2  | 16.22±1.16 <sup>E</sup>   | 17.01±2.68 <sup>E</sup>  | 21.66±3.66 <sup>DE</sup> | 8.74±3.12 <sup>E</sup>    | 24.07±2.67 <sup>CD</sup>  |
| S3  | 21.51±2.88 <sup>CD</sup>  | 25.59±1.36 <sup>CD</sup> | 31.08±1.19 <sup>BC</sup> | 22.34±3.79 <sup>B</sup>   | 28.47±2.75 <sup>BC</sup>  |
| S4  | 22.13±1.26 <sup>BCD</sup> | 29.44±2.02 <sup>C</sup>  | 33.43±3.02 <sup>AB</sup> | 23.26±1.71 <sup>AB</sup>  | 30.57±3.16 <sup>B</sup>   |
| C1  | 26.74±1.14 <sup>AB</sup>  | 53.58±3.16 <sup>B</sup>  | 37.31±3.18 <sup>A</sup>  | 20.93±0.65 <sup>BC</sup>  | 45.74±2.68 <sup>A</sup>   |
| C2  | 23.34±2.54 <sup>BC</sup>  | 56.93±1.05 <sup>AB</sup> | 27.26±2.35 <sup>CD</sup> | 23.70±3.65 <sup>AB</sup>  | 43.22±1.95 <sup>A</sup>   |
| C3  | 18.00±2.88 <sup>DE</sup>  | 57.14±3.40 <sup>AB</sup> | 21.87±2.21 <sup>DE</sup> | 19.83±3.30 <sup>BCD</sup> | 46.42±2.81 <sup>A</sup>   |
| C4  | 28.52±2.01 <sup>A</sup>   | 59.47±3.01 <sup>A</sup>  | 35.62±4.31 <sup>AB</sup> | 24.53±2.57 <sup>AB</sup>  | 46.73±3.21 <sup>A</sup>   |
| CK  | 30.19±1.02 <sup>A</sup>   | 54.16±1.90 <sup>AB</sup> | 37.42±3.88 <sup>A</sup>  | 28.89±0.68 <sup>A</sup>   | 46.83±3.68 <sup>A</sup>   |

**Table S9**Table S9. SOD activity of *M. alternifolia* treated with different PGRs in different periods (U·g<sup>-1</sup>)

| NO. | 7d                            | 14d                          | 21d                        | 28d                        | 35d                         |
|-----|-------------------------------|------------------------------|----------------------------|----------------------------|-----------------------------|
| P1  | 3117.11±21.43 <sup>DEFG</sup> | 3208.68±10.53 <sup>BC</sup>  | 3052.28±26.85 <sup>C</sup> | 2974.08±6.90 <sup>E</sup>  | 3093.80±21.79 <sup>CD</sup> |
| P2  | 3088.68±5.48 <sup>G</sup>     | 3125.93±22.41 <sup>DE</sup>  | 3045.17±5.21 <sup>C</sup>  | 2968.39±5.81 <sup>E</sup>  | 3032.09±4.29 <sup>E</sup>   |
| P3  | 3139.29±8.14 <sup>DE</sup>    | 3222.04±11.85 <sup>B</sup>   | 3127.63±21.82 <sup>B</sup> | 3195.55±6.90 <sup>B</sup>  | 3206.88±10.34 <sup>B</sup>  |
| P4  | 3126.75±11.42 <sup>DEF</sup>  | 3210.54±15.43 <sup>B</sup>   | 3075.42±10.19 <sup>C</sup> | 3028.52±10.27 <sup>D</sup> | 3123.81±10.58 <sup>C</sup>  |
| S1  | 3109.43±12.39 <sup>EFG</sup>  | 3177.68±25.63 <sup>C</sup>   | 3058.25±11.16 <sup>C</sup> | 2962.14±14.83 <sup>E</sup> | 3070.19±19.55 <sup>D</sup>  |
| S2  | 3288.86±16.64 <sup>A</sup>    | 3322.13±20.55 <sup>A</sup>   | 3281.75±13.73 <sup>A</sup> | 3240.52±4.93 <sup>A</sup>  | 3249.91±18.40 <sup>A</sup>  |
| S3  | 3125.64±12.57 <sup>DEF</sup>  | 3138.72±8.54 <sup>D</sup>    | 3107.44±6.95 <sup>B</sup>  | 2887.35±7.93 <sup>F</sup>  | 3005.64±15.50 <sup>E</sup>  |
| S4  | 3106.28±15.58 <sup>FG</sup>   | 3112.43±12.26 <sup>DEF</sup> | 3015.47±4.19 <sup>D</sup>  | 2862.53±8.36 <sup>FG</sup> | 2968.42±11.41 <sup>FG</sup> |
| C1  | 3248.77±16.33 <sup>B</sup>    | 3099.20±7.82 <sup>EF</sup>   | 3059.10±15.52 <sup>C</sup> | 3194.17±7.65 <sup>B</sup>  | 2973.23±8.59 <sup>F</sup>   |
| C2  | 3183.65±15.00 <sup>C</sup>    | 3084.70±5.91 <sup>FG</sup>   | 3048.87±4.27 <sup>C</sup>  | 3132.18±29.43 <sup>C</sup> | 2943.09±15.00 <sup>FG</sup> |
| C3  | 3142.14±18.72 <sup>D</sup>    | 3055.12±20.48 <sup>G</sup>   | 2902.42±14.98 <sup>E</sup> | 3131.90±12.58 <sup>C</sup> | 2935.69±29.03 <sup>G</sup>  |
| C4  | 3097.41±7.63 <sup>FG</sup>    | 2984.17±9.88 <sup>H</sup>    | 2841.73±9.68 <sup>F</sup>  | 3026.47±10.68 <sup>D</sup> | 2903.71±5.14 <sup>H</sup>   |
| CK  | 2985.17±4.85 <sup>H</sup>     | 2945.93±5.00 <sup>I</sup>    | 2794.94±5.68 <sup>G</sup>  | 2853.23±16.46 <sup>G</sup> | 2852.66±3.08 <sup>I</sup>   |

**Table S10**

Table S10.CAT activity of *M. alternifolia* treated with different PGRs in different periods (U·g<sup>-1</sup>)

| NO. | 7d                       | 14d                      | 21d                     | 28d                     | 35d                      |
|-----|--------------------------|--------------------------|-------------------------|-------------------------|--------------------------|
| P1  | 30.82±0.69 <sup>G</sup>  | 34.64±0.88 <sup>D</sup>  | 33.57±0.22 <sup>C</sup> | 42.81±0.14 <sup>B</sup> | 30.37±0.25 <sup>C</sup>  |
| P2  | 29.55±0.53 <sup>HI</sup> | 32.82±0.35 <sup>E</sup>  | 23.60±0.37 <sup>F</sup> | 36.92±0.54 <sup>D</sup> | 30.11±1.05 <sup>C</sup>  |
| P3  | 46.63±0.63 <sup>A</sup>  | 47.93±0.95 <sup>B</sup>  | 44.01±0.35 <sup>A</sup> | 44.73±0.41 <sup>A</sup> | 32.66±0.75 <sup>B</sup>  |
| P4  | 32.74±0.68 <sup>F</sup>  | 37.46±0.73 <sup>C</sup>  | 35.21±0.26 <sup>B</sup> | 43.18±0.43 <sup>B</sup> | 31.52±0.71 <sup>BC</sup> |
| S1  | 27.39±0.43 <sup>J</sup>  | 29.33±0.29 <sup>G</sup>  | 28.41±1.13 <sup>E</sup> | 36.39±1.03 <sup>D</sup> | 25.20±0.20 <sup>E</sup>  |
| S2  | 43.19±0.57 <sup>B</sup>  | 51.61±0.79 <sup>A</sup>  | 44.58±0.67 <sup>A</sup> | 45.86±1.03 <sup>A</sup> | 43.37±0.47 <sup>A</sup>  |
| S3  | 36.33±0.17 <sup>D</sup>  | 37.87±0.88 <sup>C</sup>  | 35.57±0.82 <sup>B</sup> | 43.43±0.76 <sup>B</sup> | 30.65±0.94 <sup>C</sup>  |
| S4  | 29.26±0.16 <sup>HI</sup> | 31.43±0.51 <sup>F</sup>  | 30.52±0.58 <sup>D</sup> | 38.71±1.12 <sup>C</sup> | 27.48±0.52 <sup>D</sup>  |
| C1  | 39.13±0.22 <sup>C</sup>  | 26.92±0.22 <sup>H</sup>  | 44.55±0.19 <sup>A</sup> | 32.36±0.27 <sup>E</sup> | 23.28±0.87 <sup>F</sup>  |
| C2  | 34.99±0.75 <sup>E</sup>  | 26.60±0.43 <sup>H</sup>  | 33.40±0.76 <sup>C</sup> | 25.75±0.50 <sup>F</sup> | 19.60±0.42 <sup>G</sup>  |
| C3  | 30.37±0.54 <sup>GH</sup> | 22.37±0.20 <sup>I</sup>  | 19.10±0.88 <sup>G</sup> | 24.19±0.40 <sup>G</sup> | 19.01±1.20 <sup>G</sup>  |
| C4  | 28.61±0.63 <sup>I</sup>  | 21.16±0.42 <sup>IJ</sup> | 18.75±0.42 <sup>G</sup> | 21.46±0.43 <sup>H</sup> | 18.68±0.62 <sup>G</sup>  |
| CK  | 18.07±0.79 <sup>K</sup>  | 20.92±0.77 <sup>J</sup>  | 18.61±0.88 <sup>G</sup> | 20.86±0.39 <sup>H</sup> | 18.46±0.56 <sup>G</sup>  |

**Table S11**

Table S11.POD activity of *M. alternifolia* treated with different PGRs in different periods (U·g<sup>-1</sup>)

| NO. | 7d                         | 14d                      | 21d                      | 28d                      | 35d                      |
|-----|----------------------------|--------------------------|--------------------------|--------------------------|--------------------------|
| P1  | 30.37±1.71 <sup>DE</sup>   | 42.96±1.28 <sup>C</sup>  | 45.19±2.80 <sup>CD</sup> | 38.52±0.64 <sup>DE</sup> | 44.44±1.11 <sup>BC</sup> |
| P2  | 26.67±1.92 <sup>EFGH</sup> | 42.59±1.28 <sup>C</sup>  | 43.96±2.31 <sup>D</sup>  | 36.30±0.64 <sup>E</sup>  | 37.78±1.92 <sup>DE</sup> |
| P3  | 44.44±1.11 <sup>A</sup>    | 45.93±3.39 <sup>BC</sup> | 63.70±2.31 <sup>A</sup>  | 51.11±2.94 <sup>B</sup>  | 59.63±3.39 <sup>A</sup>  |
| P4  | 32.41±1.67 <sup>CD</sup>   | 43.67±2.56 <sup>C</sup>  | 48.72±2.26 <sup>BC</sup> | 41.27±2.13 <sup>D</sup>  | 45.19±1.28 <sup>BC</sup> |
| S1  | 37.78±1.11 <sup>B</sup>    | 44.44±2.94 <sup>C</sup>  | 33.33±4.01 <sup>E</sup>  | 30.37±2.31 <sup>F</sup>  | 34.07±1.70 <sup>EF</sup> |
| S2  | 43.33±3.33 <sup>A</sup>    | 61.48±1.28 <sup>A</sup>  | 51.11±1.11 <sup>B</sup>  | 46.67±1.11 <sup>C</sup>  | 48.89±2.94 <sup>B</sup>  |
| S3  | 30.74±3.39 <sup>DE</sup>   | 48.89±1.11 <sup>B</sup>  | 50.37±2.31 <sup>B</sup>  | 44.81±0.64 <sup>C</sup>  | 45.19±2.80 <sup>BC</sup> |
| S4  | 29.47±2.62 <sup>DEF</sup>  | 45.27±2.23 <sup>BC</sup> | 41.48±1.53 <sup>D</sup>  | 39.53±0.92 <sup>DE</sup> | 40.26±1.67 <sup>CD</sup> |
| C1  | 35.93±1.70 <sup>BC</sup>   | 27.41±1.28 <sup>D</sup>  | 26.67±1.92 <sup>F</sup>  | 64.07±1.70 <sup>A</sup>  | 29.63±2.57 <sup>F</sup>  |
| C2  | 27.78±1.11 <sup>EFG</sup>  | 26.93±2.31 <sup>D</sup>  | 24.81±0.64 <sup>F</sup>  | 40.00±1.92 <sup>DE</sup> | 24.44±1.92 <sup>G</sup>  |
| C3  | 25.93±0.64 <sup>FGH</sup>  | 24.44±0.64 <sup>DE</sup> | 19.63±1.28 <sup>G</sup>  | 37.04±1.28 <sup>E</sup>  | 18.15±1.70 <sup>H</sup>  |
| C4  | 25.13±1.61 <sup>GH</sup>   | 23.77±1.14 <sup>DE</sup> | 16.41±1.78 <sup>G</sup>  | 32.47±1.85 <sup>F</sup>  | 15.28±2.62 <sup>HI</sup> |
| CK  | 23.33±1.11 <sup>H</sup>    | 21.48±2.31 <sup>E</sup>  | 11.48±2.80 <sup>H</sup>  | 24.07±2.31 <sup>G</sup>  | 12.22±2.22 <sup>I</sup>  |

**Table S12**

Table S12. Correlation analysis of physiological indexes of *M. alternifolia* under PP333 treatment

|                               | Soluble<br>sugar<br>content | Soluble<br>protein<br>content | MDA content | SOD<br>activity | CAT<br>activity | POD activity |
|-------------------------------|-----------------------------|-------------------------------|-------------|-----------------|-----------------|--------------|
| Soluble<br>content<br>sugar   | 1                           |                               |             |                 |                 |              |
| Soluble<br>content<br>protein | -0.016                      | 1                             |             |                 |                 |              |
| MDA content                   | -0.988*                     | 0.157                         | 1           |                 |                 |              |
| SOD activity                  | 0.816                       | -0.125                        | -0.787      | 1               |                 |              |
| CAT activity                  | 0.627                       | -0.233                        | -0.605      | 0.960*          | 1               |              |
| POD activity                  | 0.787                       | 0.078                         | -0.728      | 0.978*          | 0.929           | 1            |

\* At 0.05 level (two tailed), the correlation was significant,the same below.

\*\* At 0.01 level (two tailed), the correlation was significant,the same below.

**Table S13**

Table S13. Correlation analysis of physiological indexes of *M. alternifolia* under S3307 treatment

|                               | Soluble sugar<br>content | Soluble<br>protein<br>content | MDA<br>content | SOD<br>activity | CAT<br>activity | POD<br>activity |
|-------------------------------|--------------------------|-------------------------------|----------------|-----------------|-----------------|-----------------|
| Soluble<br>content<br>sugar   | 1                        |                               |                |                 |                 |                 |
| Soluble<br>content<br>protein | 0.785                    | 1                             |                |                 |                 |                 |
| MDA content                   | -0.962*                  | -0.863                        | 1              |                 |                 |                 |
| SOD activity                  | 0.823                    | 0.939                         | -0.94          | 1               |                 |                 |
| CAT activity                  | 0.927                    | 0.695                         | -0.960*        | 0.854           | 1               |                 |
| POD activity                  | 0.84                     | 0.341                         | -0.755         | 0.503           | 0.871           | 1               |

Table S14

Table S14. Correlation analysis of physiological indexes of *M. alternifolia* under CCC treatment

|                    | Soluble<br>content | sugar  | Soluble<br>protein<br>content | MDA<br>content | SOD<br>activity | CAT<br>activity | POD<br>activity |
|--------------------|--------------------|--------|-------------------------------|----------------|-----------------|-----------------|-----------------|
| Soluble<br>content | sugar              | 1      |                               |                |                 |                 |                 |
| Soluble<br>content | protein            | 0.901  | 1                             |                |                 |                 |                 |
| MDA content        |                    | -0.435 | -0.558                        | 1              |                 |                 |                 |
| SOD activity       |                    | 0.976* | 0.943                         | -0.349         | 1               |                 |                 |
| CAT activity       |                    | 0.758  | 0.865                         | -0.084         | 0.882           | 1               |                 |
| POD activity       |                    | 0.891  | 0.998**                       | -0.505         | 0.946           | 0.897           | 1               |

Table S15

Table S15. Content of endogenous hormones in leaves of *M. alternifolia* treated with PGRs (35d)

| NO. | IAA (ng·g <sup>-1</sup> ) | GA (ng·g <sup>-1</sup> ) | ZT (ng·g <sup>-1</sup> )  | ABA (ng·g <sup>-1</sup> ) |
|-----|---------------------------|--------------------------|---------------------------|---------------------------|
| P1  | 5.84±0.08 <sup>E</sup>    | 57.30±1.26 <sup>F</sup>  | 48.23±1.30 <sup>D</sup>   | 25.59±0.25 <sup>D</sup>   |
| P2  | 8.23±0.09 <sup>A</sup>    | 93.28±1.33 <sup>A</sup>  | 58.44±0.79 <sup>A</sup>   | 21.18±0.41 <sup>H</sup>   |
| P3  | 4.54±0.07 <sup>I</sup>    | 44.82±0.23 <sup>I</sup>  | 35.31±0.86 <sup>I</sup>   | 28.92±0.26 <sup>A</sup>   |
| P4  | 5.16±0.02 <sup>G</sup>    | 53.71±0.27 <sup>G</sup>  | 41.36±0.58 <sup>FGH</sup> | 26.75±0.36 <sup>C</sup>   |
| S1  | 5.91±0.10 <sup>E</sup>    | 64.18±1.50 <sup>D</sup>  | 51.48±1.00 <sup>C</sup>   | 25.53±0.49 <sup>D</sup>   |
| S2  | 4.69±0.08 <sup>HI</sup>   | 46.34±0.72 <sup>I</sup>  | 40.24±1.26 <sup>H</sup>   | 27.58±0.25 <sup>B</sup>   |
| S3  | 4.81±0.05 <sup>H</sup>    | 51.31±0.64 <sup>H</sup>  | 40.86±1.08 <sup>GH</sup>  | 27.18±0.48 <sup>BC</sup>  |
| S4  | 5.27±0.07 <sup>FG</sup>   | 58.83±0.29 <sup>EF</sup> | 43.13±1.73 <sup>F</sup>   | 25.86±0.29 <sup>D</sup>   |
| C1  | 6.92±0.10 <sup>C</sup>    | 75.19±0.78 <sup>B</sup>  | 57.71±1.11 <sup>A</sup>   | 22.47±0.33 <sup>G</sup>   |
| C2  | 6.36±0.10 <sup>D</sup>    | 72.61±0.76 <sup>C</sup>  | 52.80±0.81 <sup>C</sup>   | 23.29±0.21 <sup>F</sup>   |
| C3  | 5.36±0.05 <sup>F</sup>    | 57.08±0.92 <sup>F</sup>  | 42.73±1.13 <sup>FG</sup>  | 26.58±0.36 <sup>C</sup>   |
| C4  | 5.42±0.06 <sup>F</sup>    | 60.43±0.73 <sup>E</sup>  | 45.25±0.91 <sup>E</sup>   | 24.01±0.12 <sup>E</sup>   |
| CK  | 7.37±0.05 <sup>B</sup>    | 91.97±0.74 <sup>A</sup>  | 55.01±0.73 <sup>B</sup>   | 24.14±0.19 <sup>E</sup>   |

Table S16



Table S16. Correlation analysis of endogenous hormones in *M. alternifolia* under PP3333 treatment

|             | IAA content | GA content | ZT content | ABA content |
|-------------|-------------|------------|------------|-------------|
| IAA content | 1           |            |            |             |
| GA content  | 0.993**     | 1          |            |             |
| ZT content  | 0.975*      | 0.947      | 1          |             |
| ABA content | -0.992**    | -0.982*    | -0.987*    | 1           |

**Table S17**

Table S17. Correlation analysis of endogenous hormones in *M. alternifolia* under S3307 treatment

|             | IAA content | GA content | ZT content | ABA content |
|-------------|-------------|------------|------------|-------------|
| IAA content | 1           |            |            |             |
| GA content  | 0.965*      | 1          |            |             |
| ZT content  | 0.974*      | 0.891      | 1          |             |
| ABA content | -0.935      | -0.984*    | -0.832     | 1           |

**Table S18**

Table S18. Correlation analysis of endogenous hormones in *M. alternifolia* under CCC treatment

|             | IAA content | GA content | ZT content | ABA content |
|-------------|-------------|------------|------------|-------------|
| IAA content | 1           |            |            |             |
| GA content  | 0.975*      | 1          |            |             |
| ZT content  | 0.993**     | 0.984*     | 1          |             |
| ABA content | -0.824      | -0.883     | -0.885     | 1           |

Table S19

Table S19. Ratio of different endogenous hormone contents in *M. alternifolia* leaves treated with PGRs

| NO. | GA/ABA                  | IAA/ABA                 | ZT/ABA                   | (IAA+GA)/ABA            | (IAA+GA+ZT)/ABA         |
|-----|-------------------------|-------------------------|--------------------------|-------------------------|-------------------------|
| P1  | 2.239±0.71 <sup>F</sup> | 0.228±0.05 <sup>D</sup> | 1.886±0.06 <sup>E</sup>  | 2.468±0.07 <sup>F</sup> | 4.352±0.13 <sup>E</sup> |
| P2  | 4.405±0.13 <sup>A</sup> | 0.388±0.03 <sup>A</sup> | 2.759±0.02 <sup>A</sup>  | 4.793±0.13 <sup>A</sup> | 7.552±0.14 <sup>A</sup> |
| P3  | 1.550±0.01 <sup>I</sup> | 0.157±0.03 <sup>H</sup> | 1.222±0.04 <sup>J</sup>  | 1.707±0.02 <sup>J</sup> | 2.929±0.05 <sup>K</sup> |
| P4  | 2.008±0.07 <sup>G</sup> | 0.193±0.02 <sup>F</sup> | 1.546±0.02 <sup>GH</sup> | 2.201±0.04 <sup>G</sup> | 3.747±0.11 <sup>H</sup> |
| S1  | 2.514±0.05 <sup>E</sup> | 0.231±0.06 <sup>D</sup> | 2.016±0.01 <sup>D</sup>  | 2.746±0.06 <sup>E</sup> | 4.762±0.06 <sup>D</sup> |
| S2  | 1.680±0.03 <sup>H</sup> | 0.170±0.04 <sup>G</sup> | 1.459±0.04 <sup>I</sup>  | 1.850±0.03 <sup>I</sup> | 3.309±0.02 <sup>J</sup> |
| S3  | 1.888±0.04 <sup>G</sup> | 0.177±0.16 <sup>G</sup> | 1.503±0.01 <sup>HI</sup> | 2.065±0.04 <sup>H</sup> | 3.568±0.02 <sup>I</sup> |
| S4  | 2.275±0.13 <sup>F</sup> | 0.204±0.10 <sup>E</sup> | 1.668±0.03 <sup>F</sup>  | 2.479±0.02 <sup>F</sup> | 4.147±0.13 <sup>F</sup> |
| C1  | 3.347±0.08 <sup>C</sup> | 0.308±0.05 <sup>B</sup> | 2.568±0.07 <sup>B</sup>  | 3.655±0.09 <sup>C</sup> | 6.223±0.13 <sup>B</sup> |
| C2  | 3.117±0.04 <sup>D</sup> | 0.273±0.01 <sup>C</sup> | 2.267±0.02 <sup>C</sup>  | 3.390±0.04 <sup>D</sup> | 5.657±0.06 <sup>C</sup> |
| C3  | 2.148±0.06 <sup>F</sup> | 0.202±0.04 <sup>E</sup> | 1.608±0.04 <sup>FG</sup> | 2.350±0.06 <sup>F</sup> | 3.957±0.07 <sup>G</sup> |
| C4  | 2.517±0.03 <sup>E</sup> | 0.226±0.14 <sup>D</sup> | 1.885±0.02 <sup>E</sup>  | 2.743±0.02 <sup>E</sup> | 4.627±0.05 <sup>D</sup> |
| CK  | 3.809±0.05 <sup>B</sup> | 0.305±0.08 <sup>B</sup> | 2.279±0.16 <sup>C</sup>  | 4.115±0.06 <sup>B</sup> | 6.393±0.07 <sup>B</sup> |

Table S20-1

Table S20-1. Correlation analysis of physiological indexes and morphological indexes of *M. alternifolia* under PP333 treatment

|                   | Soluble sugar<br>content | Soluble protein<br>content | MDA<br>content | SOD<br>activity | CAT<br>activity | POD<br>activity |
|-------------------|--------------------------|----------------------------|----------------|-----------------|-----------------|-----------------|
| Plant height      | 0.113                    | -0.482                     | -0.286         | -0.136          | 0.46            | -0.164          |
| Stem diameter     | -0.862                   | 0.944                      | -0.049         | 0.945           | 0.582           | 0.828           |
| New branch length | 0.216                    | -0.329                     | 0.658          | 0.133           | 0.432           | -0.346          |
| Leaf length       | 0.852                    | -0.971*                    | 0.095          | -0.895          | -0.471          | -0.838          |
| Leaf width        | -<br>0.990*              | 0.862                      | -0.541         | 0.92            | 0.813           | 0.969*          |
| Leaf area         | -0.932                   | 0.737                      | -0.739         | 0.777           | 0.776           | 0.93            |

Table S20-2

Table S20-2. Correlation analysis of physiological indexes and morphological indexes of *M. alternifolia* under S3307 treatment

|                   | Soluble sugar<br>content | Soluble<br>protein content | MDA<br>content | SOD<br>activity | CAT<br>activity | POD<br>activity |
|-------------------|--------------------------|----------------------------|----------------|-----------------|-----------------|-----------------|
| Plant height      | 0.339                    | -0.258                     | 0.968*         | 0.997**         | 0.927           | 0.997**         |
| Stem diameter     | -0.853                   | 0.895                      | 0.002          | 0.127           | -0.114          | 0.178           |
| New branch length | -0.35                    | 0.429                      | 0.612          | 0.713           | 0.51            | 0.747           |
| Leaf length       | 0.716                    | -0.774                     | -0.139         | -0.285          | -0.012          | -0.326          |
| Leaf width        | -0.435                   | 0.511                      | 0.416          | 0.559           | 0.293           | 0.586           |
| Leaf area         | -0.792                   | 0.835                      | -0.113         | 0.048           | -0.241          | 0.083           |

**Table S20-3**

Table S20-3. Correlation analysis of physiological indexes and morphological indexes of *M. alternifolia* under CCC treatment

|                   | Soluble sugar<br>content | Soluble protein<br>content | MDA<br>content | SOD<br>activity | CAT<br>activity | POD<br>activity |
|-------------------|--------------------------|----------------------------|----------------|-----------------|-----------------|-----------------|
| Plant height      | -0.02                    | -0.203                     | 0.157          | 0.195           | 0.476           | 0.386           |
| Stem diameter     | 0.461                    | -0.822                     | 0.823          | 0.873           | 0.809           | 0.966*          |
| New branch length | 0.775                    | -0.983*                    | 0.978*         | 0.992**         | 0.972*          | 0.972*          |
| Leaf length       | -0.259                   | 0.478                      | -0.436         | -0.465          | -0.71           | -0.602          |
| Leaf width        | 0.622                    | -0.902                     | 0.908          | 0.94            | 0.842           | 0.958*          |
| Leaf area         | 0.856                    | -0.914                     | 0.932          | 0.919           | 0.761           | 0.774           |

**Table S20-4**

Table S20-4. Correlation analysis between endogenous hormones and morphological indexes of *M. alternifolia* under PP3333 treatment

|                   | IAA content | GA content | ZT content | ABA<br>content |
|-------------------|-------------|------------|------------|----------------|
| Plant height      | 0.966*      | 0.946      | 0.992**    | -0.990*        |
| Stem diameter     | -0.988*     | -0.998**   | -0.928     | 0.969*         |
| New branch length | 0.460       | 0.356      | 0.599      | -0.469         |
| Leaf length       | -0.876      | -0.895     | -0.868     | 0.916          |
| Leaf width        | -0.544      | -0.528     | -0.652     | 0.645          |
| Leaf area         | -0.977*     | -0.949     | -1.000**   | 0.988*         |

**Table S20-5**

Table S20-5. Correlation analysis between endogenous hormones and morphological indexes of *M. alternifolia* under S3307 treatment

|                   | IAA content | GA content | ZT content | ABA content |
|-------------------|-------------|------------|------------|-------------|
| Plant height      | 0.972*      | 0.977*     | 0.897      | -0.986*     |
| Stem diameter     | -0.959*     | -0.986*    | -0.870     | 0.996**     |
| New branch length | 0.649       | 0.432      | 0.793      | -0.350      |
| Leaf length       | 0.545       | 0.308      | 0.696      | -0.242      |
| Leaf width        | 0.731       | 0.535      | 0.860      | -0.448      |
| Leaf area         | 0.503       | 0.261      | 0.664      | -0.189      |

**Table S20-6**

Table S20-6. Correlation analysis between endogenous hormones and morphological indexes of *M. alternifolia* under CCC treatment

|                   | IAA content | GA content | ZT content | ABA content |
|-------------------|-------------|------------|------------|-------------|
| Plant height      | 0.900       | 0.886      | 0.937      | -0.945      |
| Stem diameter     | -0.995**    | -0.949     | -0.978*    | 0.770       |
| New branch length | 0.990**     | 0.936      | 0.973*     | -0.762      |
| Leaf length       | 0.981*      | 0.920      | 0.953*     | -0.703      |
| Leaf width        | 0.968*      | 0.972*     | 0.950*     | -0.749      |
| Leaf area         | 0.887       | 0.830      | 0.829      | -0.483      |
